# Supplementary material for: Mutation Screening of mtDNA Combined Targeted Exon Sequencing in a Cohort With Suspected Hereditary Optic Neuropathy
Source: PubMed Central journal article supplement — Transl Vis Sci Technol. 2020 Jul 8;9(8):11. doi: 10.1167/tvst.9.8.11 (PMC7422818; doi:10.1167/tvst.9.8.11), 2020-07-08
Supplement: tvst-9-8-11_s003.pdf [file tvst-9-8-11_s003.pdf]

**TABLE S3. Mitochondrial Haplogroup Distribution of Affected and Unaffected Subjects With m.11778G>A Mutation.**

| Haplogroup | <i>N</i> of Unaffected | <i>N</i> of Affected | Total, <i>N</i> (Penetrance, %) |
|------------|------------------------|----------------------|---------------------------------|
| A          | 0                      | 6                    | 6 (100%)                        |
| B4         | 3                      | 5                    | 8 (62.5%)                       |
| C4a        | 4                      | 4                    | 8 (50%)                         |
| D4         | 8                      | 20                   | 28 (71.4%)                      |
| D5         | 4                      | 9                    | 13 (69.2)                       |
| G          | 0                      | 3                    | 3 (100%)                        |
| H94        | 0                      | 1                    | 1 (100%)                        |
| I1         | 0                      | 2                    | 2 (100%)                        |
| M10        | 2                      | 5                    | 7 (71.4%)                       |
| M11        | 1                      | 1                    | 2 (50%)                         |
| M33        | 0                      | 2                    | 2 (100%)                        |
| M7         | 5                      | 12                   | 17 (60%)                        |
| M8a        | 1                      | 1                    | 2 (50%)                         |
| M9a1       | 0                      | 3                    | 3 (100%)                        |
| R30        | 0                      | 1                    | 1 (100%)                        |
| U4b1a      | 0                      | 1                    | 1 (100%)                        |
| Y1         | 0                      | 3                    | 3 (100%)                        |
| Y2         | 1                      | 1                    | 2 (50%)                         |
| Z3d        | 1                      | 4                    | 5 (80%)                         |
| Total      | 30                     | 84                   | 114 (73.7%)                     |
