# Supplementary material for: Mutation Screening of mtDNA Combined Targeted Exon Sequencing in a Cohort With Suspected Hereditary Optic Neuropathy
Source: PubMed Central journal article supplement — Transl Vis Sci Technol. 2020 Jul 8;9(8):11. doi: 10.1167/tvst.9.8.11 (PMC7422818; doi:10.1167/tvst.9.8.11), 2020-07-08
Supplement: tvst-9-8-11_s004.pdf [file tvst-9-8-11_s004.pdf]

**TABLE S4. Mitochondrial Haplogroup Comparison Between the 400 Control Subjects and 418 LHON Patients.**

| Haplogroup | <i>N</i> of Patients | <i>N</i> of Control Subjects |
|------------|----------------------|------------------------------|
| A          | 31                   | 34                           |
| B4         | 39                   | 50                           |
| B5         | 19                   | 7                            |
| D4         | 71                   | 60                           |
| D5         | 34                   | 24                           |
| G          | 15                   | 25                           |
| H          | 12                   | 8                            |
| I          | 2                    | 0                            |
| K          | 1                    | 0                            |
| M10        | 11                   | 7                            |
| M11        | 1                    | 3                            |
| M12        | 3                    | 1                            |
| M32        | 1                    | 0                            |
| M33        | 1                    | 0                            |
| M74        | 1                    | 0                            |
| M75        | 1                    | 0                            |
| M7         | 29                   | 29                           |
| M8         | 31                   | 38                           |
| M9         | 7                    | 10                           |
| N10        | 1                    | 0                            |
| N9         | 23                   | 23                           |
| U1         | 1                    | 0                            |
| U2         | 1                    | 0                            |
| U4         | 1                    | 0                            |
| R          | 2                    | 0                            |
| R2         | 1                    | 0                            |
| R9         | 59                   | 72                           |
| R11        | 3                    | 3                            |
| R30        | 0                    | 1                            |
| Other      | 12                   | 5                            |
| Total      | 418                  | 400                          |
